## RESEARCH ARTICLE

# The patent buyout price for human papilloma virus (HPV) vaccine and the ratio of R&D costs to the patent value

Mario Songane<sup>1\*</sup>, Volker Grossmann<sup>1,2,3\*</sup>

**1** Department of Economics, University of Fribourg, Fribourg, Switzerland, **2** Institute for the Study of Labor (IZA), Bonn, Germany, **3** CESifo, Munich, Germany

\* [mario.songane@unifr.ch](mailto:mario.songane@unifr.ch) (MS); [volker.grossmann@unifr.ch](mailto:volker.grossmann@unifr.ch) (VG)

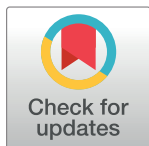

## OPEN ACCESS

**Citation:** Songane M, Grossmann V (2021) The patent buyout price for human papilloma virus (HPV) vaccine and the ratio of R&D costs to the patent value. PLoS ONE 16(1): e0244722. <https://doi.org/10.1371/journal.pone.0244722>

**Editor:** Magdalena Grce, Rudjer Boskovic Institute, CROATIA

**Received:** November 10, 2019

**Accepted:** November 20, 2020

**Published:** January 11, 2021

**Copyright:** © 2021 Songane, Grossmann. This is an open access article distributed under the terms of the [Creative Commons Attribution License](https://creativecommons.org/licenses/by/4.0/), which permits unrestricted use, distribution, and reproduction in any medium, provided the original author and source are credited.

**Data Availability Statement:** All relevant data are within the paper and its [Supporting Information](#) files.

**Funding:** MS: received a Swiss Government Excellence Scholarship granted by the Département fédéral de l'économie. The funders had no role in study design, data collection and analysis, decision to publish, or preparation of the manuscript.

**Competing interests:** The authors have declared that no competing interests exist.

## Abstract

Human papillomavirus (HPV) is responsible for almost all of the 570,000 new cases of cervical cancer and approximately 311,000 deaths per year. HPV vaccination is an integral component of the World Health Organization's (WHO) global strategy to fight the disease. However, high vaccine prices enforced through patent protection are limiting vaccine expansion, particularly in low- and middle-income countries. By limiting market power, patent buyouts could reduce vaccine prices and raise HPV vaccination rates while keeping innovation incentives. We estimate the global patent buyout price as the present discounted value (PDV) of the future profit stream over the remaining patent length for Merck's HPV vaccines (Gardasil-4 and 9), which hold 87% of the global HPV vaccine market, in the range of US\$ 15.6–27.7 billion (in 2018 US\$). The estimated PDV of the profit stream since market introduction amounts to US\$ 17.8–42.8 billion and the estimated R&D cost to US\$ 1.05–1.21 billion. Thus, we arrive at a ratio of R&D costs to the patent value of the order of 2.5–6.8%. We relate this figure to typical estimates of the probability of success (POS) for clinical trials of vaccines to discuss if patent protection provides Merck with extraordinarily strong price setting power.

## 1. Introduction

Cervical cancer, a disease mainly caused by human papillomavirus (HPV), is the fourth most common type of cancer in women with approximately 570,000 new cases and 311,000 deaths per year globally [1–3]. By 2030 cervical cancer is projected to cause around 474,000 deaths in women annually. In addition, HPV induced anogenital cancers and genital warts in males are major causes of morbidity and represent a significant health burden. Furthermore, HPV infection has been associated with cancers of the anus, vulva, vagina and penis [4, 5].

The vast majority (95%) of deaths caused by cervical cancer and around half of the world's new cases are in low-income countries (LIC) and middle-income countries (MIC) [6–9]. The highest age-standardized incidence rate is observed in countries in South Asia and Sub-Saharan region, where the vast majority of LIC and MIC are located [10]. The high prevalence of cervical cancer in these countries is caused by low coverage of HPV vaccination. In 2017 only

6% of LIC and 8% of lower-middle income countries introduced the new and effective HPV vaccines [11].

High vaccine prices, enabled by patent protection, is considered one of the main factors limiting the expansion of HPV vaccination in developing countries [12, 13]. Pharmaceutical companies that develop and manufacture vaccines frequently face demands to lower vaccine prices in order to make them affordable to poorer countries. The typical counterargument is that lower prices could induce companies to withdraw certain vaccines from the market or reduce research and development (R&D) investments for new vaccines [14, 15].

There are two strategies to promote vaccine R&D: pull programmes that provide financial reward to companies that develop successful vaccines and push programmes that provide direct funds for research. Pull programmes include prizes, compulsory licensing and patent buyouts whereas push programmes include research grants and tax credit [16]. For lowering prices of pharmaceuticals and extending access, pull programmes that limit market power of pharmaceutical companies entail larger potential.

This study focusses on patent buyouts by government agencies to supply medicines at lower costs and make them affordable to poorer countries via licensing production to many competitors [17]. The literature has suggested to determine the patent buyout value by a second-price auction [17] or to design the patent buyout by manipulating prices to infer the demand function for a pharmaceutical [18]. Based on available data and forecasts, we estimate the patent buyout price as the present discounted value (PDV) of incumbent's expected future profits over the remaining patent length for two HPV vaccines, Gardasil-4 and Gardasil-9, from 2020 onwards. We use the current and past pricing strategies in different markets by patent holder Merck jointly with sales data including future predictions provided by GAVI [19]. Our methodology requires to explicitly distinguish variable costs and fixed costs, and to account for marketing expenditure. Data on variable costs for materials, labor and capital are adapted from Clendinen *et al.* [12]. Our measure for fixed costs include overhead costs derived from data provided by Clendinen *et al.* [12] and marketing expenditure based on acquired data from 'The Nielsen Company'. We come up with regional estimates for operating profits and a global patent buyout price. Although patent buyouts for LIC and MIC would be most desirable and could in principle be relatively cheap in view of the low revenues in these countries, focussing the patent buyout on these groups of countries may be infeasible. First, pharmaceutical companies may be reluctant to this solution because they fear parallel imports or a black market for generic drugs. They may also fear public debate on prices in high-income countries (HIC) or reference pricing in health systems based on the global market, once local supply by generic manufacturers at low prices make high price-cost margins in HIC transparent [20].

We also estimate the global value of the Gardasil patents at market entry, using a similar methodology as for deriving the patent buyout price, and derive estimates of R&D costs by identifying each clinical trial sponsored by Merck on [www.clinicaltrials.gov](http://www.clinicaltrials.gov) and a literature search. We calculate the R&D costs based on previously estimated costs per subject [15], clinical trial site, and study [21]. Vaccine and drug R&D is divided in two stages, pre-clinical (*in vitro* and *in vivo* studies) and clinical trials (phase I-III). Most of the pre-clinical development of Gardasil-4 was performed by the National Cancer Institute (NCI), Georgetown University and University of Queensland who were the first to develop virus-like particle (VLP) technology used in the vaccine in the early 1990s [22]. Merck later acquired the licenses and took the then vaccine candidate to clinical testing [22].

We compute the ratio of estimated R&D costs for clinical trials to the patent value (PDV of the stream of profits from market entry to patent expiry). In theory, this ratio is the probability of success (POS) in finding an innovation that is required to just cover the R&D costs in

expected value [23]. We thus compare our estimated ratio of R&D costs to the value of the Gardasil patents with POS estimates in the literature of moving vaccines for infectious diseases successfully from Phase I to approval. This strategy allows us to discuss whether the patent system gives vaccine producers more market power than needed to serve the goal of providing incentives to start clinical trials for a particular vaccine candidate.

Our estimated global patent buyout in year 2020 for Gardasil vaccines is in the range of US \$ 15.6–27.7 billion (in 2018 US\$), depending on assumed real annual return to investment in alternative uses, price estimates, and cost estimates. The patent value, we estimate between US \$ 17.8–42.8 billion. These high values reflect our findings of high price-cost margins which could be around 100 for the U.S. and China and still well above 10 in MIC. The estimated R&D costs for both Gardasil vaccines combined lie in the range between US\$ 1.05–1.21 billion. These figures imply a ratio of R&D costs and the patent value between 2.5–6.8%. We will argue that this figure is considerably lower than we would expect from the estimated POS for vaccines from Phase I to approval in the literature, suggesting that the patent holder earns extraordinarily high profits.

Estimates of R&D costs from confidential sources such as self-reported R&D costs from pharmaceutical companies and estimates of industry experts are impossible to assess for accuracy, representativeness, or sensitivity to outliers [15]. Our estimated R&D costs may be compared to two recent studies that also assessed the costs of R&D of new medicines based on publicly available data. Prasad and Mailankody [24] found that the median R&D costs for the 10 new molecular entities approved by the U.S. Food and Drug Administration (FDA) for oncologic indications, filed in the period 2006–2015 by firms that had no other drug in the U.S. market, was US\$ 683.6 million. For novel (rather than next-in-class) drugs it was US\$ 899.2 million, ranging from US\$ 328.1 million to US\$ 1950.8 million. Wouters *et al.* [25] estimated the R&D cost for new drugs approved by the FDA in the period 2014–2018 with publicly available data. Dividing the costs of clinical trials by phase-specific POS estimates to account for failed trials (which means that their estimates are not directly comparable to ours) they came up with median R&D costs of US\$ 985.3 million.

## 1.1 Background: Vaccines for HPV

HPV is a group that encompasses over 100 viruses and 15 of them have been shown to be responsible for almost all cases of cervical cancer: HPV 16, 18, 31, 33, 35, 39, 45, 51, 52, 56, 58, 59, 68, 73, and 82 [26]. One of the challenges to create a vaccine and treatment for HPV is the fact that an individual can be infected by more than one HPV type [27]. Globally, HPV 16 and 18 are responsible for approximately 70% of all cases of cervical cancer. HPV type 16 causes mainly squamous cell carcinoma whereas HPV 18 causes the less aggressive adenocarcinoma [28]. In Africa, HPV 16 and 18 are responsible for 43.7–90.2% of the invasive cervical cancer cases [29].

The two most widely used prophylactic vaccines in the market are Gardasil-4 (Merck, NJ, USA) and Cervarix (GlaxoSmithKline-GSK, Middlesex, UK). Gardasil-4 was approved for both U.S. and European markets in September 2006 whereas Cervarix was approved in September 2007 [30, 31]. They target HPV L1 major capsid protein that assemble to form VLPs with a morphology similar to the HPV native virions and generate robust antibody responses against the targeted HPV types [32]. Both vaccines contain VLPs for HPV 16 and 18, which cause cervical cancer, but Gardasil-4 also has VLPs for HPV 6 and 11, which cause benign genital warts. The U.S. Food and Drug Administration (FDA) approved Gardasil-4 for immunization against HPV in males and females aged between 9–26 years whereas Cervarix is approved only for females aged between 10–25 years [32]. Merck introduced a new HPV vaccine,

Gardasil-9, in the U.S. and Europe in 2014 and 2015 respectively. In addition to the four HPV types covered in Gardasil-4, the new vaccine also provides protection against HPV types 31, 33, 45, 52 and 58 [33].

Vaccination is an integral part of the WHO global strategy to combat HPV infections and related diseases [9]. According to WHO recommendations, girls aged 9–14 years should receive two doses of Gardasil-4 whereas older age groups receive three doses [9]. When given at recommended doses, Gardasil-4 has been shown to induce antibody protection against HPV types covered by the vaccine for at least 5 years [27, 34]. In males aged 16–26 years, Gardasil-4 has been shown to provide 90.4% efficacy against lesions related to HPV types covered by the vaccine [35].

It is estimated that 70–80% of females in pre-pubertal age have to be vaccinated in order to achieve herd immunity [36]. Although HPV vaccination has been introduced in 81 countries, the high costs of the vaccine and the fact that it requires the delivery of two or three doses over a period of 6 months makes it a significant financial and structural burden to most countries in the world. For this reason, most LIC and MIC struggle to maintain HPV vaccination without the aid of other countries and global organizations such as the WHO, the Global Vaccine Alliance (GAVI), United Nations International Children's Emergency Fund (UNICEF) and Pan American Health Organization (PAHO) [31]. In these countries, it has been estimated that HPV vaccination has the potential to reduce the lifetime risk of cervical cancer by 31–60% [37].

Academic institutes in the U.S. and Australia first developed the technology employed in the VLP-based vaccines in the early 1990s. Merck and GSK then improved on the original invention and performed the subsequent steps required to bring the vaccine to the market [22]. Merck's Gardasil-4, the first VLP based vaccine, was patented in the U.S. in 1998 and introduced in the market in 2006 [38]. Between the first patent approval and 2010, 81 HPV vaccine related patents were granted in the U.S. with Merck leading the way with 24 granted patents [22]. Table 1 shows global revenues of Gardasil and Cervarix between 2006 and 2018, suggesting that Gardasil has dominated with an average market share of 87% in the period

**Table 1. Global revenue of Gardasil and Cervarix from 2006–2018.**

|      | Gardasil (in million US\$)* | Cervarix (in million US\$)** |
|------|-----------------------------|------------------------------|
| 2006 | 234.8                       | 0                            |
| 2007 | 1,480.6                     | 20.1                         |
| 2008 | 1,402.8                     | 248.75                       |
| 2009 | 1,118.4                     | 306.68                       |
| 2010 | 988                         | 367.84                       |
| 2011 | 1,209                       | 814.66                       |
| 2012 | 1,631                       | 423.9                        |
| 2013 | 1,831                       | 261.44                       |
| 2014 | 1,738                       | 202.96                       |
| 2015 | 1,908                       | 137.28                       |
| 2016 | 2,173                       | 106.92                       |
| 2017 | 2,308                       | 172.86                       |
| 2018 | 3,151                       | 180.78                       |

\* Includes sales of Gardasil-4 and Gardasil-9. From 2016 onwards, only Gardasil-9 was sold in the U.S. [39, 40].

\*\* Original revenues are in Great Britain Pound (£). We used the exchange rate of the respective year on July 2 [41] to calculate the revenue in US\$.

Sources: Merck [33, 42–46], GSK [47–52].

<https://doi.org/10.1371/journal.pone.0244722.t001>

2007–2018. For this reason and because it is effective against more HPV types, we focus on Gardasil.

There is no centralized database to obtain information about the status of the various patents related to a particular vaccine in different countries/regions. In the U.S., Gardasil patents expire in 2028, and similarly in other advanced countries [33, 53]. We focus on patent buyout prices for all country groups and total patent values until 2028.

The biggest factor that will drive the increase in global demand of HPV vaccine is the introduction of HPV vaccination in China, India and Indonesia (three of the four most populous countries in the world). These countries are expected to represent approximately 1/3 of the global market by 2030 [19, 54]. China, India and Indonesia delayed the introduction of Gardasil-4 and Gardasil-9 in their public health programmes due to concerns over safety, effectiveness of the vaccine across different age groups and price. China approved the introduction of Gardasil-4 and Gardasil-9 in 2017 and 2018 respectively, Indonesia introduced Gardasil-4 in late 2015 and India did so in 2018 [55–58].

## 1.2 The benefit of HPV vaccine patent buyout

Our focus on HPV vaccination derives, apart from data availability issues, from its importance for global health and the prevalence of HPV related diseases particularly in developing countries. Patents like those for HPV vaccines provide intellectual property protection that bars entry of generic competitors for an extended period of time, therefore awarding monopoly price setting power. Because inventions use prior knowledge that is protected by patents, it is *a priori* not evident that patents are stimulating innovation [59]. One of the strategies to counter patents is to challenge them on court. However, it is a long and expensive process that most small and medium sized companies cannot afford. Another strategy is to work around patents. This, however, is very challenging because patents often cover various stages of the vaccine development and manufacturing process [60]. Working around patents increases uncertainty and costs, thus constituting a barrier for vaccine development.

Under the agreement on trade-related aspects of intellectual property rights (TRIPS), administered by the World Trade Organization (WTO) and enforced in 1995, member countries with an industry capable of manufacturing vaccines must enforce patent protection of medicines and biological products [60]. There is evidence that TRIPS limited access to pharmaceuticals formerly manufactured by local suppliers [20]. However, under the agreement, the least-developed countries [61] are not obliged to provide patent protection in general until 2021, and on medicines (including vaccines) specifically until 2033 [62].

Brazil, India and China have a large generic pharmaceutical industry supplying 64% of vaccines purchased by UNICEF and 43% of vaccines procured by GAVI [22]. In addition to manufacturing generic vaccines, these countries are also capable of developing HPV vaccines themselves [22]. A common strategy used in the pharmaceutical industry to limit competition from Brazil, India and China is to apply for patents in these countries. There has been over 100 HPV vaccine related patent applications with GSK and Merck, the two companies that dominate the HPV vaccine market, having by far the highest number of patent applications [60].

WHO has launched a global effort to eliminate cervical cancer by promoting introduction of HPV vaccination in all countries [54]. Accordingly, 48 GAVI-supported countries announced plans to introduce multi-age cohort HPV vaccination and protect approximately 40 million girls by 2020 [54]. However current manufacturers could not match the demand leading to supply shortages and the goal been reduced to protect only 14 million girls [63]. Moreover, the introduction of HPV vaccination in China, India and Indonesia adds significantly to global demand. From 2023 the demand for HPV vaccines is likely to exceed production capacity [19].

Another factor limiting the expansion of HPV vaccination are the high prices of HPV vaccines that are prohibitive to GAVI and PAHO supported LIC and MIC [13]. To date, 74% of the 81 countries that have introduced the HPV vaccination self-procure the vaccines [54].

The discussion strongly suggests that the entrance of new manufacturers is crucial to ensure sufficient supply and lower HPV vaccine prices, thus increasing static economic efficiency by mitigating price setting power of the incumbent [17]. Given the currently high price-cost margins we display in this research, patent buyout for the market leader Gardasil-4 and Gardasil-9 that puts the right to manufacture and sell the vaccine into public domain could allow fast entry of competitors and development of new and less expensive technology (i.e. plant-based production). Importantly, a patent buyout price equal to the estimated PDV of the expected stream of future profits would most likely fully compensate the innovator for the expected loss in profits from market transactions while keeping incentives for future innovators unchanged (i.e. not compromising dynamic efficiency).

Despite these arguments in favor of the patent buyout at the suggested price, we do not aim to calculate the net social benefit from the patent buyout because of several difficulties to predict the entry response of generic manufacturers and the price responses by the patent holder. First, for some period of time after the buyout, Merck would likely continue to be the major supplier and prices may remain significantly above marginal costs. It is also plausible that some LIC and MIC countries would choose to postpone introducing HPV vaccination (or postpone scaling up pilot programs) until after generics enter the market, if they knew it was imminent. Likewise, GAVI and the PAHO revolving fund would aim at negotiating lower prices.

## 2. Methodology and data

We first propose our methodology to estimate the patent buyout price and to assess the extent of price setting power in the market of HPV vaccination. We then discuss the data and assumptions for our estimations.

### 2.1 Theoretical considerations on the patent buyout price

Our first goal is to estimate the PDV of the expected future stream of real profits for the vaccine Gardasil, starting from year  $T$ , i.e. year 2020 this gives us the patent buyout price (with caveats discussed in Section 4) for the vaccine Gardasil under the assumption of risk-neutrality. Arguably, large pharmaceutical companies like Merck can be considered risk-neutral as they are owned by shareholders that can hold diversified asset portfolios. Moreover, they have diversified product portfolios and can diversify R&D effort. By contrast, a (small) risk-averse company facing market uncertainty would agree to a patent buyout price that is lower than the PDV of expected future profits.

To calculate the time path of profits, we need estimates for sales prices, variable costs, and fixed costs. We assume that the variable cost per unit (dose) is independent of the number of produced doses such that total variable costs are proportional to the units sold. They consist of:

- user costs of physical capital (equipment, building, pipes),
- costs for materials needed to express and purify the VLPs of the targeted HPV types,
- costs for filling and packaging (staff and material),
- costs for operating labor (manufacturing operators, quality assurance, and quality control operators).

Fixed costs consist of:

- overhead labor costs for managing and supervising the manufacturing process in the facilities used for producing the vaccine,
- labor costs for maintaining the facilities and equipment,
- marketing expenditure (direct-to-consumer advertising and promotion on health providers).

We follow Clendinen *et al.* [12] to treat maintenance costs as fixed costs, albeit we checked that our results are not significantly affected by this choice. We depart from Clendinen *et al.* [12] by modelling capital investments as variable rather than fixed costs to account for the possibility of alternative uses (“user costs of capital”), as is standard in economics.

Legal costs for patent defence, patent infringement disputes, product liability litigations, commercial litigations, government proceedings or environmental matters should generally be considered as fixed costs. Merck gives a detailed account of these costs in its annual reports. However, so far, no legal proceedings or costs were reported for Gardasil-4 and Gardasil-9. Also notably, R&D expenditures are incurred *ex ante* and thus cannot be considered being part of the fixed cost [64].

That said, we still miss some labor-intensive fixed cost components that are private information like building relations with suppliers of material, training costs and costs for developing the manufacturing to scale process and packaging design. There is reason to assume, however, that in the present context these costs are small. First, large scale manufacturing of VLP based vaccines was already being done in the 1990s and early 2000s for a variety of VLPs vaccines against HEV, influenza, BTV, rotavirus and PPV [65]. All the techniques, technologies and equipment were routinely used at the time when Gardasil was being developed. Moreover, for manufacturing its other vaccines Merck had already established supplier relations for the bulk of the material components to produce Gardasil.

We also miss distribution costs. However, the vast majority of distribution costs are covered by government and NGO’s. In the U.S., the Centers for Disease Control (CDC) Vaccine Supply and Assurance Branch (VSAB) oversees all aspects of its vaccine purchase and distribution in the country [66]. In the EU, the most common strategy is for the manufacturers shipping vaccines to distribution centres and wholesalers, who are then responsible for the distribution within the country [67]. In GAVI supported countries the distribution is carried by governments and the various partnering NGOs, i.e. WHO, UNICEF, etc. [67].

We index the country (group) in which Gardasil is sold by  $j \in \{1, 2, \dots, J\}$  and denote the time horizon by  $T$  (U.S. patent expiry year 2028 in our application). We use information about the time paths of the predicted future number of doses sold at the regional level,  $\{y_{jt}\}_{t=\underline{T}}^T$ . We deflate all prices and costs to its 2018 US\$ value for obtaining the time series of real profits. For data availability reasons, we assume that the variable unit cost is time-invariant in *real* terms. In year  $t$ , operating profits from sales to country group  $j$  are then given by

$$\pi_{jt} = (p_{jt} - c)y_{jt}, \quad (1)$$

where  $p_{jt}$  and  $y_{jt}$  denote sales prices and number of doses in region  $j$  and year  $t$ , respectively, and  $c$  the variable costs per dose.

Based on Eq No. 1, we can then estimate the present discounted value (PDV) of the stream of operating profits from period  $\underline{T}$  onwards in country group  $j$  until time  $T$  as

$$\Pi_j \left( \underline{T} \right) := \sum_{t=\underline{T}}^T \frac{\pi_{jt}}{(1+r)^{t-\underline{T}}} \quad (2)$$

where  $r$  is the real annual return to investment in alternative uses (like deposits in banks, equity holding, government bonds, etc.). We present our estimates for the annual real interest rate  $r$  in the range of 3–7%.

Fixed costs are typically not region-specific, as production takes place in few facilities and the product is shipped from there. We denote real global fixed costs in year  $t$  by  $f_t$  and the PDV of the fixed cost stream from period  $\underline{T}$  until time  $T$  by

$$F(\underline{T}) := \sum_{t=\underline{T}}^T \frac{f_t}{(1+r)^{t-\underline{T}}}. \quad (3)$$

Thus, the global patent buyout price in year  $\underline{T}$  for the considered regions is given by

$$V(\underline{T}) := \sum_{j=1}^J \Pi_j(\underline{T}) - F(\underline{T}). \quad (4)$$

We assume that both variable unit cost  $c$  and fixed costs  $F$  are the same for Gardasil-4 and Gardasil-9.

Arguably, buying out a patent in  $\underline{T}$  at the PDV of future profits,  $V(\underline{T})$ , fully compensates the patent holder for its profit losses associated with lower price setting power and is thus incentive-compatible.

## 2.2 Required probability of success (POS) to break even

We also aim to estimate the patent value from the perspective of the date introduced in the market and compare it with R&D costs. Gardasil-4 was introduced in September 2006, i.e. 2007 was the first full year Gardasil was sold. To generate conservative estimates of the patent value and since we do not have price information for 2006, we neglect profits for 2006 and include marketing costs for 2006 in total fixed costs for 2007.

Denoting the first full year of market introduction  $s \leq \underline{T}$ , the total patent value is given by  $V(s)$ . If the market for innovations is characterized by free entry and firms are risk-neutral, the expected value of an innovation (accounting for a potentially high risk of R&D failure) equals R&D costs [23]. Formally, let  $\mu$  denote the POS in the innovation process, such that  $\mu \cdot V(s)$  is the expected patent value (in case of R&D failure, with probability  $1-\mu$ , profits are zero). A firm is incentivized to conduct the innovation project as long as  $\mu \cdot V(s) \geq R\&D\ costs$ . The POS required to break even in expected value is given when the inequality is binding. It is defined as

$$\mu_0 := \frac{R\&D\ costs}{V(s)} \quad (5)$$

Our data allows us to estimate the right-hand side of Eq No. 5. To assess market power, we compare the estimated  $\mu_0$  with typical estimates of the average POS for clinical trials of other vaccines reported in the literature. Higher price setting power would increase  $V(s)$  and thus decrease  $\mu_0$ . A value of  $\mu_0$  that is considerably lower than the average POS found for other vaccines could therefore indicate excessive price setting power of the patent holder.

In our context of HPV vaccines, the POS is the cumulative probability of moving from the three phases of clinical trials to approval. Recall that Gardasil-9 was an improvement of Gardasil-4, the first VLP-based HPV vaccine approved by the FDA [68]. Gardasil-4 and Gardasil-9 are typically not sold in parallel within the same region. Thus, for obtaining  $\mu_0$ , we sum up both the PDV of profits from both Gardasil-4 and Gardasil-9 since market introduction until patent expiry when computing  $V(s)$ , the denominator of Eq No. 5, and sum up the R&D costs for both to compute the numerator.



## 2.3 Data and assumptions

We now outline the data sources, how we extrapolate missing information, and how we deal with measurement problems and uncertainty with respect to future values. We convert all monetary variables to 2018 US\$, using the U.S. consumer price index [69]. Detailed statistics and derivations based on the assumptions to extrapolate missing data are relegated to the “S1 File” on the article.

**2.3.1 Data for operating profits.** According to Eq No. 1, calculating regional operating profits requires estimates of regional sales prices ( $p_{jt}$ ), regional number of doses sold ( $y_{jt}$ ), and variable unit cost ( $c$ ). The prices of HPV vaccines vary greatly depending on procurement agreement and countries' income [9]. Merck and GSK have agreements with organizations such as GAVI, that mediates purchase of vaccine to developing countries in Africa and Asia and PAHO, that mediates vaccine purchase to LIC and MIC in South and Central America [70, 71]. When Gardasil-4 was introduced in the U.S. market, the median price was US\$ 96.75 per dose to CDC funded programs and US\$ 120.5 per dose to the private sector. It was the most expensive vaccine in the world at the time [40, 72]. In 2018, Gardasil-9 was sold at a price of US\$144.2 and US\$ 217.1 to CDC and the private sector, respectively (S2 Table in S1 File) [40]. The median U.S. private sector price for Gardasil-9 in 2016 was about twice as high than in other HIC and about 25% higher than in China [73, 74]. The median Gardasil-4 price in 2016 was about US\$ 20 in MIC [9], US\$ 4.50 for sales mediated by GAVI [9] and in-between in India [75] and Indonesia [76] (S1 Table in S1 File). We assume that from 2019 onwards regional prices stay the same as the latest one observed (in 2018 US\$), taking Gardasil-9 prices for HIC and China and Gardasil-4 prices for the other regions. Due to the price difference between the U.S. and other HIC, we treat the U.S. as separate region, assuming that half of the units sold in the U.S. are mediated by CDC funded programs and the other half by the private sector.

Through its own databases and interviews with stakeholders (i.e. national vaccination programme managers, industry leaders and experts), GAVI [19] estimated the number of HPV doses sold between 2010–2017 by country group and forecasted quantities for 2018–2027, however, without distinguishing the U.S. and other HIC. To break down the number of units sold between the U.S. and other HIC, we use the global sales revenues in Table 1 and the revenue for the U.S. for 2015–2017 that is additionally available in Merck's annual report [77] to find that about three quarters of the global sales revenue is earned in the U.S. (S3a Table in S1 File). Assuming that this has also been the case in 2007–2014, information on prices and revenues for the U.S. allow us to distil the number of doses (revenue divided by price) in the U.S. (S3b Table in S1 File). Moreover, although GAVI [19] did not estimate the number of doses sold from 2007–2009, we obtain the number of doses sold in other HIC from the additional information that in this time period Gardasil was sold in HIC only (S3c Table in S1 File). For the period 2018–2027, we assume that the share of the number of doses in the U.S. within HIC is the same as the average in 2007–2017 (about 60%) (S4 Table in S1 File). We suppose that the number of doses in patent expiry year 2028, for which we do not have data, is the same as predicted for 2027.

We account for measurement problems of past vaccine doses' sales and uncertainty in the predictions for future sales by creating a “low” and “high” scenario by deducting and adding 20% of the sales of doses sold to the middle estimates that we derive by the outlined procedure (S5a and S5b Table in S1 File). For instance, the predictions are based on the current dosage recommendation for HPV vaccination. However, a recent clinical trial in India showed that a single dose of Gardasil induces a robust and sustained immune response against HPV 16 and 18 (although slightly inferior to those induced by the standard 3-doses vaccination) and the

antibody levels were stable over a four-year period [78]. Interestingly, the cumulative incidence of HPV 16 and 18 infections was similarly low in those that received one, two or three doses of Gardasil [78]. If more studies show further evidence that a single dose is sufficient to protect against HPV-16 and 18 infection, then the forecasted number of doses required could be significantly lower. Likewise, it is possible that future demand is underestimated because of regional changes in health strategies.

Merck's Gardasil-4 is produced from a combination of non-infectious and non-oncogenic VLPs that mimic the virion structure of the infectious particles of common HPV strains. It contains four VLPs of HPV type 6, 11, 16, and 18 each absorbed onto aluminium hydroxyphosphate sulphate (AAHS) adjuvant. The manufacturing process has four steps: cultivation, extraction, purification type-specific VLPs from L1-recombinant producer cells, filling and packaging [12]. Associated variable costs consist of annual costs for labor, per-batch costs for raw materials, and capital costs. We take over the "low" and "high" estimate of annualized capital costs (for building, equipment and pipes) from Clendinen *et al.* [12] (S6a Table in S1 File). Based on the average number of doses sold between 2010–2017, we obtain the unit variable capital costs of Gardasil-4 (S6b Table in S1 File). Similarly, we use the estimate of the unit costs for materials provided by Clendinen *et al.* [12]. The "high" estimate is based on the life science and technology companies list prices in 2013 (in 2018 US\$) and the "low" estimate on a 40% discount on the cost for materials (S7 Table in S1 File). Regarding labor costs, we deviate from Clendinen *et al.* [12] by distinguishing variable and fixed labor costs, taking over their range of salary estimates and required staff for the different occupations. We treat salaries of manufacturing operators, quality assurance operators, quality control operators and fill/pack staff per unit as variable costs (S8 Table in S1 File).

**2.3.2 Data for fixed costs.** Fixed manufacturing costs consist of management and supervisor overhead costs, and the costs of maintenance of the facility, and the equipment according to 'Good Manufacturing Practices' guidelines (electricity, heating, cooling and operation of the machinery) (S10a Table in S1 File). As such "factory and administrative overhead" costs are not readily available, we take over the assumption in Clendinen *et al.* [12] that they correspond to 45% of the total cost for other personnel and material (S10b Table in S1 File).

The second component of fixed costs are marketing expenditures. We obtained the time series of Merck's direct-to-consumer advertising (DTCA) expenditure to promote Gardasil-4 and Gardasil-9 in the U.S. since market entry from 'The Nielsen Company'. We use their additional information that DTCA spending in the U.S. is 90% of the global spending and create two scenarios for the missing marketing expenditure of health care providers (S11 Table in S1 File). First, for the low-cost scenario we assume that 2/3 of global marketing spending is on DTCA. The scenario is motivated by the evidence that Merck's marketing strategy focused to a large extent on raising awareness of the general public of the risk of cervical cancer. Gardasil was marketed as vaccine against such cancer, aiming to increase demand from consumers for HPV vaccination [79]. Second, for the high-cost scenario, we assume that global marketing spending on health care providers is twice as high than marketing spending on DTCA. The range for the marketing cost split is consistent with evidence on other pharmaceuticals [80]. Our data for DTCA spending suggests that marketing expenditures decline quickly over the life-cycle of a new vaccine. We assume that annual spending from year 2020 onwards equals, in real terms, the average annual spending in the last three available years (2017–2019).

**2.3.3 Data for R&D investment.** The elements discussed so far allow us to calculate the total patent value,  $V(s)$ , according to Eqs No. 1–4. To apply Eq No. 5, we relate these to R&D costs. We add the costs of clinical trials (phase I to III). Notably, we do not include the costs of clinical development because it was mainly performed by academic institutions [22]. To

estimate the costs of each clinical trial we performed a literature review coupled with a search in [www.clinicaltrials.gov](http://www.clinicaltrials.gov) to identify the Gardasil related clinical trials sponsored by Merck in each phase. To calculate the costs on subjects (set-up, recruitment, administration and support) for each clinical phase we use the phase-specific estimates of costs per subject in Light *et al.* [15] (S12 Table in [S1 File](#)) and multiply them with the number of subjects identified in [www.clinicaltrials.gov](http://www.clinicaltrials.gov). In addition to subject-related costs, there are site costs (for recruitment and retention of subjects as well as administrative and site monitoring) and study costs (data collection and management, institutional review board approvals and amendments, source data verification, overheads and other costs) (S13 Table in [S1 File](#)). Both site and study costs per trial in the three phases are taken from Sertkaya *et al.* [21] and multiplied with the number of clinical trials in each phase for Gardasil-4 (S14a Table in [S1 File](#)) and Gardasil-9 (S14b Table in [S1 File](#)).

According to [www.stats.oecd.org](http://www.stats.oecd.org), capital R&D costs in business enterprises for “basic pharmaceutical products and pharmaceutical preparations” are typically around 10% of non-capital R&D costs (e.g. 10.4% in the UK 2016, 10.1% in Germany 2017, 11.3% in Japan 2018; retrieved July 19, 2020). We add 10–15% to the subject-related, site and study costs to account for R&D capital costs.

### 3. Results and discussion

#### 3.1 Operating profits

Based on the assumptions and data presented in Section 2.3, [Table 2](#) displays the middle estimates for number of doses sold in different (groups) countries between 2007–2017 and forecasted until 2027. The forecasts in [Table 2](#) suggest that annual future sales are slightly increasing in HIC and MIC. Globally, they more than triple because of sales increases in emerging markets and those mediated by GAVI.

[Table 3](#) displays the range of variable costs per dose (1.00–1.59 US\$) and its composition. We see that costs for materials, filling and packaging are responsible for about one third of variable costs. Filling and packaging represents almost 60% of these costs, being composed of the wholesale cost of the vial, cap and stopper (for single-dose packaging) at US\$ 0.21 per dose plus secondary packaging materials at US\$ 0.10 per dose [12]. About one quarter of variable costs are labor earnings. The remaining costs are capital costs (about half for building and half for equipment).

It is interesting to look at price-cost margins. Even based on the high estimate for variable costs, the mark-up factor (price divided by unit variable costs) in 2016 is around 100 for the U.S. and China, twelve in MIC and almost three for sales mediated by GAVI.

We derive two estimates for regional operating profits. The “high” estimate combines the 20% upward deviation from the middle estimates of the number of doses in [Table 2](#) with the “low” unit cost estimate in [Table 3](#) (regional prices are given in S1 and S2 Tables in [S1 File](#)), applying Eq No. 1, and vice versa for the “low” estimate. Based on those, we apply Eq No. 2 to derive the PDV ranges of the future (2020–2028) and total (2007–2028) stream of operating profits. [Table 4](#) presents the results for three interest rates,  $r = 0.03$ ,  $r = 0.05$  and  $r = 0.07$ . We estimate the PDV of future operating profits from the perspective of year 2020 in the range of US\$ 16.45–28.94 billion, and the total PDV of the stream operating profits from the perspective of year 2007 in the range of US\$ 19.82–44.25 billion. Reflecting the comparatively high sales prices in the U.S., half of the future profits are earned in the U.S. The profit share earned in the U.S. is even higher when considering the time period 2007–2028, as the sales share in the U.S. market was higher in the past than predicted for the future, reflecting market expansion to less developed countries.

**Table 2. Number of Gardasil doses sold in different countries and country groups between 2010–2017 and forecasted quantities until 2027 (middle estimates), in millions.**

| Year                        | HIC total     | U.S.         | Other HIC    | MIC           | GAVI          | India/ Indonesia | China        | Total         |
|-----------------------------|---------------|--------------|--------------|---------------|---------------|------------------|--------------|---------------|
| 2007                        | 19.60         | 10.42        | 9.18         | 0.00          | 0.00          | 0.00             | 0.00         | 19.60         |
| 2008                        | 17.88         | 9.50         | 8.38         | 0.00          | 0.00          | 0.00             | 0.00         | 17.88         |
| 2009                        | 13.95         | 7.25         | 6.70         | 0.00          | 0.00          | 0.00             | 0.00         | 13.95         |
| 2010                        | 15.66         | 6.32         | 9.34         | 6.09          | 0.00          | 0.00             | 0.00         | 21.75         |
| 2011                        | 20.88         | 8.18         | 12.70        | 11.31         | 0.00          | 0.00             | 0.00         | 32.19         |
| 2012                        | 18.27         | 10.66        | 7.61         | 13.92         | 0.00          | 0.00             | 0.00         | 32.19         |
| 2013                        | 17.40         | 11.54        | 5.86         | 13.92         | 0.87          | 0.00             | 0.00         | 32.19         |
| 2014                        | 15.23         | 10.13        | 5.10         | 11.31         | 0.87          | 0.00             | 0.00         | 27.41         |
| 2015                        | 14.79         | 10.81        | 3.98         | 9.57          | 1.74          | 0.00             | 0.00         | 26.10         |
| 2016                        | 15.66         | 11.39        | 4.27         | 9.57          | 2.61          | 0.87             | 0.00         | 28.71         |
| 2017                        | 15.66         | 9.75         | 5.91         | 9.57          | 1.74          | 0.87             | 0.00         | 27.84         |
| <b>Subtotal (2007–2017)</b> | <b>133.55</b> | <b>78.77</b> | <b>54.77</b> | <b>85.26</b>  | <b>7.83</b>   | <b>1.74</b>      | <b>0.00</b>  | <b>228.38</b> |
| 2018*                       | 14.79         | 8.84         | 5.95         | 10.44         | 5.22          | 0.87             | 0.00         | 31.32         |
| 2019*                       | 15.23         | 9.10         | 6.12         | 12.18         | 23.49         | 0.87             | 0.00         | 51.77         |
| 2020*                       | 16.53         | 9.88         | 6.65         | 13.05         | 34.80         | 0.87             | 0.00         | 65.25         |
| 2021*                       | 15.66         | 9.36         | 6.30         | 13.05         | 26.97         | 13.92            | 0.00         | 69.60         |
| 2022*                       | 14.79         | 8.84         | 5.95         | 13.05         | 28.71         | 25.23            | 0.87         | 82.65         |
| 2023*                       | 13.92         | 8.32         | 5.60         | 13.05         | 31.32         | 23.49            | 2.61         | 84.39         |
| 2024*                       | 13.05         | 7.80         | 5.25         | 13.92         | 21.75         | 24.36            | 3.48         | 76.56         |
| 2025*                       | 12.18         | 7.28         | 4.90         | 14.79         | 27.84         | 21.75            | 3.48         | 80.04         |
| 2026*                       | 12.18         | 7.28         | 4.90         | 14.79         | 26.10         | 20.01            | 4.35         | 77.43         |
| 2027*                       | 12.18         | 7.28         | 4.90         | 14.79         | 25.23         | 18.27            | 6.09         | 76.56         |
| <b>Subtotal (2018–2027)</b> | <b>140.51</b> | <b>84.02</b> | <b>56.48</b> | <b>133.11</b> | <b>251.43</b> | <b>149.64</b>    | <b>20.88</b> | <b>695.57</b> |

Source: Own calculations displayed in S1–S4 Tables in [S1 File](#).

<https://doi.org/10.1371/journal.pone.0244722.t002>

### 3.2 Fixed costs

We next derive the PDV of fixed costs by applying Eq No. 3. [Table 5](#) lists the estimated annual manufacturing fixed costs. These are based on the labor compensation for the required number of directors, managers and supervisors for the current factory in Durham, North Carolina, as presented in Clendinen *et al.* [12] and on the “factory and administrative overhead”, corresponding to 45% of the total cost for personnel and material (Section 2.3).

Recently, Merck announced an expansion of the North Carolina facility and build a new one, the two facilities are expected to be fully operational from 2022 [81]. Since the additional

**Table 3. Variable costs for manufacturing Gardasil, in 2018 US\$.**

|                                                              | Low estimate      | High estimate       |
|--------------------------------------------------------------|-------------------|---------------------|
| Costs for materials, filling and packaging per million doses | 323,947.53        | 539,912.55          |
| Variable labor costs per million doses                       | 243,506.49        | 340,909.09          |
| Variable capital costs per million doses                     | 428,067.87        | 711,251.24          |
| <b>Total variable costs per million doses</b>                | <b>995,521.89</b> | <b>1,592,072.88</b> |
| <b>Total variable costs per dose</b>                         | <b>1.00</b>       | <b>1.59</b>         |

Source: Own calculations displayed in S6b–S8 Tables in [S1 File](#).

<https://doi.org/10.1371/journal.pone.0244722.t003>

Table 4. Estimated PDV of the stream of operating profits (in million 2018 US\$) for the periods 2020–2028 and 2007–2028, applying Eq No. 2.

|                     | Interest rate ( <i>r</i> ) | Estimate | 2020–2028 | 2007–2028 |
|---------------------|----------------------------|----------|-----------|-----------|
| U.S.                | 0.03                       | High     | 14,210.23 | 27,584.81 |
|                     |                            | Low      | 9,442.37  | 18,319.64 |
|                     | 0.05                       | High     | 13,297.34 | 23,009.99 |
|                     |                            | Low      | 8,835.78  | 15,280.53 |
|                     | 0.07                       | High     | 12,488.32 | 19,507.41 |
|                     |                            | Low      | 8,298.20  | 12,953.80 |
| Other HIC           | 0.03                       | High     | 4,987.46  | 7,881.96  |
|                     |                            | Low      | 3,304.06  | 5,203.35  |
|                     | 0.05                       | High     | 4,667.06  | 6,541.63  |
|                     |                            | Low      | 3,091.80  | 4,316.87  |
|                     | 0.07                       | High     | 4,383.11  | 5,531.79  |
|                     |                            | Low      | 2,903.69  | 3,649.14  |
| MIC                 | 0.03                       | High     | 2,604.31  | 3,801.51  |
|                     |                            | Low      | 1,683.73  | 2,457.74  |
|                     | 0.05                       | High     | 2,417.15  | 3,045.89  |
|                     |                            | Low      | 1,562.73  | 1,969.22  |
|                     | 0.07                       | High     | 2,251.97  | 2,477.06  |
|                     |                            | Low      | 1,455.94  | 1,601.46  |
| GAVI                | 0.03                       | High     | 983.84    | 786.55    |
|                     |                            | Low      | 550.95    | 440.47    |
|                     | 0.05                       | High     | 919.39    | 581.95    |
|                     |                            | Low      | 514.86    | 325.89    |
|                     | 0.07                       | High     | 862.34    | 434.61    |
|                     |                            | Low      | 482.91    | 243.38    |
| Indonesia and India | 0.03                       | High     | 1,807.90  | 1,258.95  |
|                     |                            | Low      | 1,136.10  | 791.14    |
|                     | 0.05                       | High     | 1,669.09  | 906.87    |
|                     |                            | Low      | 1,048.87  | 569.89    |
|                     | 0.07                       | High     | 1,545.54  | 658.69    |
|                     |                            | Low      | 971.23    | 413.93    |
| China               | 0.03                       | High     | 4,342.43  | 2,938.32  |
|                     |                            | Low      | 2,884.17  | 1,951.58  |
|                     | 0.05                       | High     | 3,902.78  | 2,048.96  |
|                     |                            | Low      | 2,592.16  | 1,360.88  |
|                     | 0.07                       | High     | 3,517.86  | 1,440.22  |
|                     |                            | Low      | 2,336.50  | 956.57    |
| TOTAL               | 0.03                       | High     | 28,936.17 | 44,252.10 |
|                     |                            | Low      | 19,001.38 | 29,163.92 |
|                     | 0.05                       | High     | 26,872.81 | 36,135.28 |
|                     |                            | Low      | 17,646.20 | 23,823.28 |
|                     | 0.07                       | High     | 25,049.13 | 30,049.77 |
|                     |                            | Low      | 16,448.47 | 19,818.28 |

Source: Own calculations based on S9 Table in S1 File.

<https://doi.org/10.1371/journal.pone.0244722.t004>

factories will also be based in the U.S., we assume that the costs are the same in these additional factories. Thus, current fixed manufacturing costs are multiplied by three to obtain an estimate for fixed manufacturing costs from 2022 onwards.

**Table 5. Annual manufacturing fixed costs, in million 2018 US\$.**

|                                                              | Low estimate  | High estimate |
|--------------------------------------------------------------|---------------|---------------|
| Fixed costs for directors, managers, supervisors             | 1.000         | 1.436         |
| Factory and administrative overhead                          | 7.740         | 11.963        |
| <b>Total fixed costs per factory per year (2007–2021)</b>    | <b>8.740</b>  | <b>13.399</b> |
| <b>Total fixed costs in 3 factories per year (2022–2028)</b> | <b>26.221</b> | <b>40.196</b> |

Source: Own calculations displayed in S10a and S10b Table in [S1 File](#).

<https://doi.org/10.1371/journal.pone.0244722.t005>

Based on DTCA spending data for the Gardasil vaccines in the U.S. (90% of global DTCA spending), the assumptions on marketing spending on health providers, and the annual fixed manufacturing costs in Tables 5 and 6 displays the PDV of the stream of fixed costs and its split for the periods 2020–2028 and 2007–2028. The PDV of DTCA spending in the U.S. from 2007–2019 is in the range of US\$ 582–659 million (in 2018 US\$), depending on the interest rate.

Assuming that global marketing spending on health providers is 50% and 150% of global DTCA spending for the “low” and “high” estimate, respectively, implies that the PDV of the stream of global marketing costs from the perspective of 2007 is in the range of US\$ 1.11–2.12 billion (in 2018 US\$). It exceeds the PDV of manufacturing fixed costs for the period 2007–2028 considerably (US\$ 140–330 million) and is at least as high as R&D costs, as will become apparent in Section 3.4. We estimate that the PDV of future manufacturing costs from the perspective of 2020 amounts to US\$ 149–270 million. It exceeds the PDV of the stream of marketing costs in the period 2020–2028 (based on the annual average in the period 2017–2019), reflecting that marketing spending has sharply declined some years after market introduction. The PDV of total future fixed costs from the perspective of 2020 is in the range of US\$ 213–393 million. For the entire patent length, the PDV of the total fixed cost stream from the perspective of 2007 amounts to US\$ 1.25–2.45 billion.

### 3.3 Estimated global value of Gardasil patents and the patent buyout price

Using Eq No. 4, Table 7 shows the patent value from 2007–2028 and for the remaining patent length, 2020–2028, based on the information the PDV of the stream of operating profits and fixed costs, respectively. The PDV of the future profit stream in Table 7 is somewhat lower than shown in Table 4 as we left out the PDV of the operating profit stream from GAVI supported countries. The reason is that these countries are not obliged to provide patent protection on vaccines until 2033 [62] such that a patent buyout is not beneficial. We include those

**Table 6. PDV of the stream of fixed manufacturing and marketing costs from 2020–2028 and 2007–2028, in million 2018 US\$, applying Eq No. 3.**

| Interest rate ( <i>r</i> ) | Estimate | PDV fixed manufact. costs, 2020–28 | PDV marketing costs, 2020–28 | Total 2020–2028 | PDV fixed manufact. costs, 2007–28 | PDV of marketing costs, 2007–28 | Total 2007–2028 |
|----------------------------|----------|------------------------------------|------------------------------|-----------------|------------------------------------|---------------------------------|-----------------|
| 0.03                       | High     | 269.548                            | 123.240                      | 392.788         | 330.320                            | 2,118.761                       | 2,449.082       |
|                            | Low      | 175.833                            | 74.032                       | 249.865         | 215.476                            | 1,272.781                       | 1,488.257       |
| 0.05                       | High     | 247.675                            | 114.688                      | 362.363         | 263.503                            | 1,970.337                       | 2,233.840       |
|                            | Low      | 161.565                            | 68.895                       | 230.460         | 171.890                            | 1,183.620                       | 1,355.509       |
| 0.07                       | High     | 228.379                            | 107.129                      | 335.508         | 214.590                            | 1,844.744                       | 2,059.335       |
|                            | Low      | 148.977                            | 64.354                       | 213.332         | 139.983                            | 1,108.174                       | 1,248.156       |

Source: Own calculations based on Table 5 and S11 Table in [S1 File](#).

<https://doi.org/10.1371/journal.pone.0244722.t006>

Table 7. Estimated global patent buyout price in 2020 and total patent value of Gardasil (2007–2028) in million 2018 US\$, applying Eq No. 4.

| Interest rate ( <i>r</i> ) | Patent value estimate* | PDV of operating profits, 2020–28** | PDV of fixed costs, 2020–28 | Global patent buyout Price | PDV of operating profits, 2007–28 | PDV of fixed costs, 2007–28 | Total patent value |
|----------------------------|------------------------|-------------------------------------|-----------------------------|----------------------------|-----------------------------------|-----------------------------|--------------------|
| 0.03                       | High                   | 27,952.33                           | 249.87                      | 27,702.46                  | 44,252.10                         | 1'488.26                    | 42,763.84          |
|                            | Low                    | 18,450.43                           | 392.79                      | 18,057.64                  | 29,163.92                         | 2'449.08                    | 26,714.84          |
| 0.05                       | High                   | 25,953.42                           | 230.46                      | 25,722.96                  | 36,135.28                         | 1'355.51                    | 34,779.77          |
|                            | Low                    | 17,131.34                           | 362.36                      | 16,768.97                  | 23,823.28                         | 2'233.84                    | 21,589.44          |
| 0.07                       | High                   | 24,186.80                           | 213.33                      | 23,973.46                  | 30,049.77                         | 1'248.16                    | 28,801.62          |
|                            | Low                    | 15,965.56                           | 335.51                      | 15,630.06                  | 19,818.28                         | 2'059.33                    | 17,758.94          |

\* For the high patent value estimate, we take the high estimate for the PDV of operating profits and deduct the low estimate of the PDV of fixed costs. Vice versa for the low patent value estimate.

\*\* We did not include operating profits from GAVI supported countries.

Source: Own calculations based on S9 Table in S1 File and Table 6.

<https://doi.org/10.1371/journal.pone.0244722.t007>

profits to derive the total patent value for 2007–2028. We estimate the global patent buyout price in 2020 when assuming patent expiry in 2028 in the range of US\$ 15.6–27.7 billion (in 2018 US\$), whereas the total patent value from the perspective of 2007 amounts to US\$ 17.8–42.8 billion (in 2018 US\$).

### 3.4 R&D cost estimates for Gardasil and its relation to the patent value

We next relate the total value of the Gardasil patents in Table 7 to its R&D costs and discuss the result in view of the observed POS for finding new vaccines in the literature.

In phase I of clinical trials the vaccine is tested in a small number of healthy individual to identify the best route to administer the vaccine, frequency and dose escalation, the maximum tolerated dose (MTD), and side effects [82]. The main aim of phase II is to demonstrate the efficacy and immunogenicity of the vaccine candidate in a larger group [82]. In phase III, the safety, immunogenicity, and efficacy of the final dosage of the vaccine is tested in thousands of subjects and is tested against a placebo and/or another vaccine in the market [59].

Light *et al.* [15] estimated that the cost per subject (set-up, recruitment, administration and support) is between US\$ 100–400 in phase I, US\$ 300–400 in phase II, and US\$ 2000–3000 in phase III (in 2008 US\$). Moreover, according to Sertkaya *et al.* [21], the site costs are US\$ 682,284 for phase I, US\$ 3,791,310 for phase II, and US\$ 5,647,045 for phase III. The study costs for phase I is US\$ 2,058,396 US\$ 6,273,284 for phase II, and US\$ 9,063,763 for phase III (average costs from 2004–2012 in current US\$). We use these numbers jointly with the information of clinical trials (that includes subject numbers) to come up with R&D costs, separated by phases and type of cost.

As shown in Table 8, for Gardasil-4, we arrive at R&D costs in the range of US\$ 539.80–594.41 million and for Gardasil-9 in the range of US\$ 419.18–458.24 million.

Table 9 presents total R&D costs by adding up the documented outlays for Gardasil-4 and Gardasil-9 and R&D capital costs. Capital costs are assumed to be 10% and 15% of the low estimate and high estimate of the R&D costs presented in Table 8, respectively. Doing so, we estimate total R&D costs of both vaccines between US\$ 1,054.9–1,210.5 million.

We finally put our estimates for total R&D costs in relation to the estimates of the total value of the Gardasil patents. This provides us with a range for the innovation probability that is required to cover R&D costs in expected value of the patents, as defined by  $\mu_0$  in Eq No. 5. The lower bound is found by dividing the low estimate for R&D costs from Table 9 (US\$ 1,055 million) and the high estimate of the patent value (US\$ 42,764 million) from Table 7, which

**Table 8. Estimated R&D costs on subjects, site and study of Gardasil-4 and Gardasil-9 (in 2018 US\$).**

|                                       |                                          | Estimate (in 2018 US\$) |                    |                    |                    |
|---------------------------------------|------------------------------------------|-------------------------|--------------------|--------------------|--------------------|
|                                       |                                          | Gardasil-4              |                    | Gardasil-9         |                    |
|                                       |                                          | Low                     | High               | Low                | High               |
| Phase-I                               | Total spent on subjects                  | 94,070                  | 376,279            | 18,372             | 73,488             |
|                                       | Total spent on sites                     | 3,173,414               | 3,173,414          | 793,353            | 793,353            |
|                                       | Total spent of study costs               | 9,573,935               | 9,573,935          | 2,393,484          | 2,393,484          |
|                                       | Total spent on phase I clinical trials   | 12,841,419              | 13,123,628         | 3,202,637          | 3,250,037          |
| Phase-II                              | Total spent on subjects                  | 1,684,186               | 2,245,581          | 1,068,488          | 1,424,651          |
|                                       | Total spent on sites                     | 22,042,500              | 22,042,500         | 17,634,000         | 17,634,000         |
|                                       | Total spent of study costs               | 36,472,581              | 36,472,581         | 29,178,065         | 29,178,065         |
|                                       | Total spent on phase II clinical trials  | 60,199,267              | 60,760,663         | 47,880,553         | 48,236,716         |
| Phase-III                             | Total spent on subjects                  | 107,539,535             | 161,309,302        | 77,297,674         | 115,946,512        |
|                                       | Total spent on sites                     | 137,892,959             | 137,892,959        | 111,627,634        | 111,627,634        |
|                                       | Total spent of study costs               | 221,324,445             | 221,324,445        | 179,167,408        | 179,167,408        |
|                                       | Total spent on phase III clinical trials | 466,756,940             | 520,526,707        | 368,092,716        | 406,741,553        |
| <b>Total spent on clinical trials</b> |                                          | <b>539,797,626</b>      | <b>594,410,998</b> | <b>419,178,479</b> | <b>458,238,595</b> |

Source: Own calculations based on S12 and S13 Tables in [S1 File](#) jointly with S14a Table in [S1 File](#) for Gardasil-4 and S14b Table in [S1 File](#) for Gardasil-9.

<https://doi.org/10.1371/journal.pone.0244722.t008>

gives us  $\mu_0 = 0.025$ . For the upper bound, dividing the high estimate for R&D costs (US\$ 1,210 million) and the low estimate of the patent value (US\$ 17,759 million) implies  $\mu_0 = 0.068$ .

What do we know about the POS for vaccines targeting infectious diseases to which we can compare our estimate for  $\mu_0$ ? In a sample of more than 1,800 trials at phase I in the 2000s, Wong *et al.* [83] found a POS of about one third. In the previous literature, the lowest POS estimates from moving from phase I to phase II and from moving to phase II to phase III are 50% and 22%, respectively, whereas the highest POS estimates are 90% and 79%, respectively [84]. This suggests a cumulative POS in clinical trials above 10%. Notably, the low POS estimates sometimes reported in the literature include pre-clinical trials that are not applicable here [85]. In sum, the POS estimates for other vaccines are significantly higher than our estimated  $\mu_0$ , suggesting that the Gardasil patents generate extraordinarily high profits.

#### 4. Concluding remarks

Patents are an effective strategy to prevent new entrants in the market. The high number of patent applications for HPV vaccines by Merck and GSK in emerging countries with a large pharmaceutical industry such as China, Brazil and India shows that it is a strategy commonly implemented [60]. Patent buyouts for pharmaceuticals are potentially welfare-enhancing by

**Table 9. Total R&D cost derivation (in 2018 US\$).**

|                                         | Low estimate         | High estimate        |
|-----------------------------------------|----------------------|----------------------|
| Gardasil-4 (subjects, site, study)      | 539,797,626          | 594,410,998          |
| Gardasil-9 (subjects, site, study)      | 419,178,479          | 458,238,595          |
| <b>Subtotal (subjects, site, study)</b> | <b>958,976,105</b>   | <b>1,052,649,593</b> |
| Capital costs*                          | 95,897,610           | 157,897,439          |
| <b>Total Gardasil R&amp;D costs</b>     | <b>1,054,873,715</b> | <b>1,210,547,032</b> |

\* 10% of Subtotal for the low estimate, 15% of the Subtotal for the high estimate.

Source: Own calculations based on [Table 8](#).

<https://doi.org/10.1371/journal.pone.0244722.t009>



removing monopoly price distortions and increasing drug availability by stimulating generic entry. Maintaining innovation incentives requires that the patent holder is fully compensated for its foregone profits. In this paper, we have calculated this patent buyout price for Merck's HPV vaccines as the PDV of the future profit stream until the patent expiry in 2028.

We estimated that the remaining patent buyout value for Gardasil supplied by Merck in 2020 as the PDV of the future stream of expected profits in the range of US\$ 15.6–27.7 billion (in 2018 US\$), depending on the assumed interest rate for discounting and the estimated ranges for the number of demanded doses, variable costs, and fixed costs. On the one hand, the estimated remaining private patent value may be viewed as an upper bound for the patent buyout price since the original manufacturer Merck would still be able to make profits after the patent buyout because of its brand name and its established production capacity. On the other hand, given the private information of the patent holder, we may want to propose a sufficiently high patent buyout price that is unlikely to fall short of the remaining patent value, to incentivize the patent holder to agree to the patent buyout. In sum, albeit calculating the net social benefit of the patent buyout is beyond the scope of this paper, the suggested range for the patent buyout price may be viewed as a benchmark for negotiating an agreement with the patent holder.

While the global patent buyout of Gardasil we suggest is incentive-compatible for the patent holder, it is a financially challenging proposal. A preferable albeit not necessarily successful strategy to reduce prices could be to reach a licensing agreement with Merck to allow generic manufacturing of Gardasil for LIC and MIC. The Medicines Patent Pool (MPP), a United Nations-backed global health organization, negotiates with pharmaceutical companies and other global health stakeholders (i.e. governments and NGOs) licensing to allow generic companies to manufacture low cost medicines for LIC and MIC [86]. This patent pooling model has been successfully implemented for medicines against tuberculosis, HIV and hepatitis: 13 HIV antiretrovirals, three Hepatitis C direct-acting antivirals and one tuberculosis treatment have been licensed through MPP [86]. Merck licensed Raltegravir through MPP, a pediatric HIV antiretroviral medicine, for generic production for LIC and MIC [87]. However, this licensing agreement does not cover technology and data owned by Merck and in the case of Gardasil such an agreement has not been reached yet. The main obstacle to the MPP solution could be the concern of patent holders that entry of generic manufacturers may affect the market in HIC by parallel imports or a public debate on prices charged by the original manufacturer.

In order to assess the price setting power of Merck in providing its HPV vaccines, we have also estimated both the R&D costs and the global patent value, which is the PDV of the profit stream for the period 2007–2028. The ratio of these figures is the POS needed to break even in expected value. Using information on clinical trials, we estimated the R&D costs for the Gardasil innovation to be around US\$ 1.05–1.21 billion, while the global patent value amounts to US\$ 17.8–42.8 billion. The implied R&D to patent value ratio of 2.5–6.8% is below the average POS in clinical trials for vaccines found in the literature. As a caveat and suggestion for future research, making the point that the current patent system generates excessive price setting power, i.e. is more generous than needed to elicit desirable R&D effort, would require estimations of the relationship between R&D cost and the patent value for many more pharmaceuticals. Availability of such information may alter price negotiations for prescription drugs in health systems and may ultimately call for adjustment of the patent system.

## Supporting information

**S1 File.**  
(DOCX)

## Acknowledgments

We are grateful to three expert reviewers, among them Dr. Stephen Resch, for their excellent comments and suggestions.

## Author Contributions

**Conceptualization:** Mario Songane, Volker Grossmann.

**Data curation:** Mario Songane, Volker Grossmann.

**Formal analysis:** Mario Songane, Volker Grossmann.

**Funding acquisition:** Mario Songane, Volker Grossmann.

**Investigation:** Mario Songane, Volker Grossmann.

**Methodology:** Mario Songane, Volker Grossmann.

**Project administration:** Mario Songane, Volker Grossmann.

**Supervision:** Volker Grossmann.

**Validation:** Mario Songane, Volker Grossmann.

**Visualization:** Mario Songane, Volker Grossmann.

**Writing – original draft:** Mario Songane, Volker Grossmann.

**Writing – review & editing:** Mario Songane, Volker Grossmann.

## References

1. Wang R, Pan W, Jin L, Huang W, Li Y, Wu D, et al. Human papillomavirus vaccine against cervical cancer: Opportunity and challenge. Vol. 471, *Cancer Letters*. Elsevier Ireland Ltd; 2020. p. 88–102. <https://doi.org/10.1016/j.canlet.2019.11.039> PMID: 31812696
2. de Martel C, Plummer M, Vignat J, Franceschi S. Worldwide burden of cancer attributable to HPV by site, country and HPV type. *Int J Cancer* [Internet]. 2017 Aug 15 [cited 2020 Jun 21]; 141(4):664–70. Available from: /pmc/articles/PMC5520228/?report = abstract <https://doi.org/10.1002/ijc.30716> PMID: 28369882
3. Kumar P, Gupta S, Das AM, Das BC. Towards global elimination of cervical cancer in all groups of women [Internet]. Vol. 20, *The Lancet Oncology*. Lancet Publishing Group; 2019 [cited 2020 Jun 21]. p. e237. Available from: <http://www.thelancet.com/article/S1470204519301706/fulltext>
4. Frisch M, Goodman MT. Human papillomavirus-associated carcinomas in Hawaii and the mainland U. S. *Cancer* [Internet]. 2000 Mar 15 [cited 2018 Nov 15]; 88(6):1464–9. Available from: <http://www.ncbi.nlm.nih.gov/pubmed/10717631> [https://doi.org/10.1002/\(sici\)1097-0142\(20000315\)88:6<1464::aid-cncr26>3.0.co;2-o](https://doi.org/10.1002/(sici)1097-0142(20000315)88:6<1464::aid-cncr26>3.0.co;2-o) PMID: 10717631
5. Insinga RP, Dasbach EJ, Elbasha EH. Assessing the Annual Economic Burden of Preventing and Treating Anogenital Human Papillomavirus-Related Disease in the US. *Pharmacoeconomics* [Internet]. 2005 [cited 2018 Nov 8]; 23(11):1107–22. Available from: <https://doi.org/10.2165/00019053-200523110-00004> PMID: 16277547
6. de Sanjosé S, Serrano B, Castellsagué X, Brotons M, Muñoz J, Bruni L, et al. Human papillomavirus (HPV) and related cancers in the Global Alliance for Vaccines and Immunization (GAVI) countries. A WHO/ICO HPV Information Centre Report. *Vaccine* [Internet]. 2012 Nov 20 [cited 2018 Oct 23]; 30:D1–83. Available from: <http://www.ncbi.nlm.nih.gov/pubmed/23510764> [https://doi.org/10.1016/S0264-410X\(12\)01435-1](https://doi.org/10.1016/S0264-410X(12)01435-1) PMID: 23510764
7. Saxena U, Sauvaget C, Sankaranarayanan R. Evidence-based screening, early diagnosis and treatment strategy of cervical cancer for national policy in low- resource countries: example of India. *Asian Pac J Cancer Prev* [Internet]. 2012 [cited 2018 Nov 15]; 13(4):1699–703. Available from: <http://www.ncbi.nlm.nih.gov/pubmed/22799391> <https://doi.org/10.7314/apjcp.2012.13.4.1699> PMID: 22799391
8. MSF. The right shot: extending the reach of affordable and adapted vaccines. Geneva; 2015.
9. UNICEF. Human Papillomavirus Vaccine: Supply and Demand Update [Internet]. 2018. Available from: [https://www.unicef.org/supply/files/HPV\\_2\\_Status\\_Update.pdf](https://www.unicef.org/supply/files/HPV_2_Status_Update.pdf)

10. Arbyn M, Weiderpass E, Bruni L, de Sanjosé S, Saraiya M, Ferlay J, et al. Estimates of incidence and mortality of cervical cancer in 2018: a worldwide analysis. *Lancet Glob Heal*. 2020 Feb 1; 8(2):e191–203.
11. Bloem P, Ogbuanu I. Vaccination to prevent human papillomavirus infections: From promise to practice. Vol. 14, *PLoS Medicine*. Public Library of Science; 2017.
12. Clendinen C, Zhang Y, Warburton RN, Light DW. Manufacturing costs of HPV vaccines for developing countries. *Vaccine* [Internet]. 2016 Nov 21 [cited 2018 Oct 16]; 34(48):5984–9. Available from: <https://linkinghub.elsevier.com/retrieve/pii/S0264410X16308568> <https://doi.org/10.1016/j.vaccine.2016.09.042> PMID: 27771183
13. Bloem P. HPV Vaccines Uptake and Barriers [Internet]. Geneva; 2019 [cited 2020 Mar 22]. Available from: [https://www.who.int/immunization/sage/meetings/2019/october/bloem\\_hpv\\_sage\\_october\\_2019.pdf](https://www.who.int/immunization/sage/meetings/2019/october/bloem_hpv_sage_october_2019.pdf)
14. Outtersson K. Pharmaceutical arbitrage: balancing access and innovation in international prescription drug markets. *Yale J Health Policy Law Ethics* [Internet]. 2005 [cited 2018 Nov 14]; 5(1):193–291. Available from: <http://www.ncbi.nlm.nih.gov/pubmed/15742578> PMID: 15742578
15. Light DW, Andrus JK, Warburton RN. Estimated research and development costs of rotavirus vaccines. *Vaccine* [Internet]. 2009 Nov 5 [cited 2018 Oct 16]; 27(47):6627–33. Available from: <https://www.sciencedirect.com/science/article/pii/S0264410X09011062> <https://doi.org/10.1016/j.vaccine.2009.07.077> PMID: 19665605
16. Mueller-Langer F. Neglected infectious diseases: Are push and pull incentive mechanisms suitable for promoting drug development research? *Heal Econ Policy Law* [Internet]. 2013 Apr 24 [cited 2018 Oct 8]; 8(02):185–208. Available from: [http://www.journals.cambridge.org/abstract\\_S1744133112000321](http://www.journals.cambridge.org/abstract_S1744133112000321) <https://doi.org/10.1017/S1744133112000321> PMID: 23343639
17. Kremer M. Patent Buyouts: A Mechanism for Encouraging Innovation. *Q J Econ* [Internet]. 1998 Nov 1 [cited 2018 Oct 6]; 113(4):1137–67. Available from: <https://academic.oup.com/qje/article-lookup/doi/10.1162/003355398555865>
18. Galasso A, Mitchell M, Virag G. Market outcomes and dynamic patent buyouts. *Int J Ind Organ* [Internet]. 2016 Sep 1 [cited 2018 Oct 10]; 48:207–43. Available from: <https://www.sciencedirect.com/science/article/pii/S0167718716301084>
19. GAVI. Supply and Procurement Roadmap—Human Papilloma Virus Vaccine [Internet]. Geneva; 2017. Available from: <https://www.gavi.org/about/market-shaping/supply-and-procurement-roadmaps/>
20. Goldberg PK. Intellectual Property Rights Protection in Developing Countries: The Case of Pharmaceuticals. *J Eur Econ Assoc* [Internet]. 2010 Apr 5 [cited 2020 Jun 21]; 8(2–3):326–53. Available from: <https://academic.oup.com/jeea/article-lookup/doi/10.1111/j.1542-4774.2010.tb00506.x>
21. Sertkaya A, Wong H-H, Jessup A, Beleche T. Key cost drivers of pharmaceutical clinical trials in the United States. *Clin Trials* [Internet]. 2016 Apr 8 [cited 2019 Jan 22]; 13(2):117–26. Available from: <https://doi.org/10.1177/1740774515625964> PMID: 26908540
22. Padmanabhan S, Amin T, Sampat B, Cook-Deegan R, Chandrasekharan S. Intellectual property, technology transfer and manufacture of low-cost HPV vaccines in India. *Nat Biotechnol* [Internet]. 2010 Jul 1 [cited 2018 Dec 17]; 28(7):671–8. Available from: <http://www.nature.com/articles/nbt0710-671> <https://doi.org/10.1038/nbt0710-671> PMID: 20622834
23. Aghion P, Howitt P. A Model of Growth through Creative Destruction. *Econometrica*. 1992; 60(2):323–51.
24. Prasad V, Mailankody S. Research and development spending to bring a single cancer drug to market and revenues after approval. *JAMA Intern Med* [Internet]. 2017 Nov 1 [cited 2020 Nov 14]; 177(11):1569–75. Available from: <https://www.fda.gov> <https://doi.org/10.1001/jamainternmed.2017.3601> PMID: 28892524
25. Wouters OJ, McKee M, Luyten J. Estimated Research and Development Investment Needed to Bring a New Medicine to Market, 2009–2018 [Internet]. Vol. 323, *JAMA—Journal of the American Medical Association*. American Medical Association; 2020 [cited 2020 Nov 14]. p. 844–53. Available from: <https://jamanetwork.com/>
26. Clifford G, Gallus S, Herrero R, Muñoz N, Snijders P, Vaccarella S, et al. Worldwide distribution of human papillomavirus types in cytologically normal women in the International Agency for Research on Cancer HPV prevalence surveys: a pooled analysis. *Lancet* [Internet]. 2005 Sep 17 [cited 2018 Oct 23]; 366(9490):991–8. Available from: <https://www.sciencedirect.com/science/article/pii/S0140673605670699> [https://doi.org/10.1016/S0140-6736\(05\)67069-9](https://doi.org/10.1016/S0140-6736(05)67069-9) PMID: 16168781
27. Choi YH, Chapman R, Gay N, Jit M. Potential overestimation of HPV vaccine impact due to unmasking of non-vaccine types: Quantification using a multi-type mathematical model. *Vaccine* [Internet]. 2012 May 14 [cited 2018 Nov 15]; 30(23):3383–8. Available from: <https://www.sciencedirect.com/science/article/pii/S0264410X12004574> <https://doi.org/10.1016/j.vaccine.2012.03.065> PMID: 22480925

28. Bosch FX, Burchell AN, Schiffman M, Giuliano AR, de Sanjose S, Bruni L, et al. Epidemiology and Natural History of Human Papillomavirus Infections and Type-Specific Implications in Cervical Neoplasia. *Vaccine* [Internet]. 2008 Aug 19 [cited 2018 Nov 15]; 26:K1–16. Available from: <http://www.ncbi.nlm.nih.gov/pubmed/18847553> <https://doi.org/10.1016/j.vaccine.2008.05.064> PMID: 18847553
29. Louie KS, De Sanjose S, Mayaud P. Epidemiology and prevention of human papillomavirus and cervical cancer in sub-Saharan Africa: a comprehensive review. *Trop Med Int Heal* [Internet]. 2009 Oct 1 [cited 2018 Nov 8]; 14(10):1287–302. Available from: <https://doi.org/10.1111/j.1365-3156.2009.02372.x> PMID: 19772550
30. EMA. Gardasil [Internet]. European Medical Agency. 2009 [cited 2019 May 25]. Available from: <https://www.ema.europa.eu/en/medicines/human/EPAR/gardasil>
31. McKee SJ, Bergot A-S, Leggatt GR. Recent progress in vaccination against human papillomavirus-mediated cervical cancer. *Rev Med Virol* [Internet]. 2015 Mar [cited 2018 Nov 9]; 25:54–71. Available from: <https://doi.org/10.1002/rmv.1824> PMID: 25752816
32. Ma B, Roden R, Wu T-C. Current status of human papillomavirus vaccines. *J Formos Med Assoc* [Internet]. 2010 Jul [cited 2018 Nov 9]; 109(7):481–3. Available from: <http://www.ncbi.nlm.nih.gov/pubmed/20677402> [https://doi.org/10.1016/s0929-6646\(10\)60081-2](https://doi.org/10.1016/s0929-6646(10)60081-2) PMID: 20677402
33. Merck. Merck & Co., Inc. 2017 annual report as filed with the Securities and Exchange Commission [Internet]. Washington, D.C.; 2018. Available from: <https://investors.merck.com/financials/annual-reports-and-proxy/default.aspx>
34. Garland SM, Hernandez-Avila M, Wheeler CM, Perez G, Harper DM, Leodolter S, et al. Quadrivalent Vaccine against Human Papillomavirus to Prevent Anogenital Diseases. *N Engl J Med* [Internet]. 2007 May 10 [cited 2018 Oct 29]; 356(19):1928–43. Available from: <http://www.nejm.org/doi/abs/10.1056/NEJMoa061760> PMID: 17494926
35. Giuliano AR, Palefsky JM, Goldstone S, Moreira ED, Penny ME, Aranda C, et al. Efficacy of Quadrivalent HPV Vaccine against HPV Infection and Disease in Males. *N Engl J Med* [Internet]. 2011 Feb 3 [cited 2018 Nov 15]; 364(5):401–11. Available from: <http://www.ncbi.nlm.nih.gov/pubmed/21288094> <https://doi.org/10.1056/NEJMoa0909537> PMID: 21288094
36. McGraw SL, Ferrante JM. Update on prevention and screening of cervical cancer. *World J Clin Oncol* [Internet]. 2014 Oct 10 [cited 2018 Nov 9]; 5(4):744–52. Available from: <http://www.ncbi.nlm.nih.gov/pubmed/25302174> <https://doi.org/10.5306/wjco.v5.i4.744> PMID: 25302174
37. Goldie SJ, O'Shea M, Campos NG, Diaz M, Sweet S, Kim S-Y. Health and economic outcomes of HPV 16, 18 vaccination in 72 GAVI-eligible countries. *Vaccine* [Internet]. 2008 Jul 29 [cited 2018 Nov 15]; 26(32):4080–93. Available from: <http://www.ncbi.nlm.nih.gov/pubmed/18550229> <https://doi.org/10.1016/j.vaccine.2008.04.053> PMID: 18550229
38. Castro A, Cinà M, Helmer-Smith M, Vlček C, Oghor C, Cazabon D. A case study of Gavi's human papillomavirus vaccine support programme. *J Heal Spec* [Internet]. 2017 [cited 2018 Dec 17]; 5(1):2. Available from: <http://www.thejhs.org/text.asp?2017/5/1/2/198797>
39. CDC. Vaccines and Immunizations [Internet]. Center for Disease Control and Prevention. 2018 [cited 2018 Oct 11]. Available from: <https://www.cdc.gov/vaccines/index.html>
40. CDC. Archived CDC Vaccine Price Lists [Internet]. US Centers for Disease Control and Prevention. 2018 [cited 2018 Oct 11]. Available from: <https://www.cdc.gov/vaccines/programs/vfc/awardees/vaccine-management/price-list/archive.html>
41. MacroTrends. Pound Dollar Exchange Rate (GBP USD)—Historical Chart [Internet]. MacroTrends. 2019 [cited 2019 Oct 13]. Available from: <https://www.macrotrends.net/2549/pound-dollar-exchange-rate-historical-chart>
42. Merck. Merck & Co. 2008 annual report as filed with the Securities and Exchange Commission. 2009.
43. Merck. Merck & Co. 2007 annual report as filed with the Securities and Exchange Commission [Internet]. 2008. Available from: <https://investors.merck.com/financials/annual-reports-and-proxy/default.aspx>
44. Merck. Merck & Co., Inc. 2014 annual report as filed with the Securities and Exchange Commission [Internet]. 2015. Available from: <https://investors.merck.com/financials/annual-reports-and-proxy/default.aspx>
45. Merck. Merck & Co., Inc. 2011 annual report as filed with the Securities and Exchange Commission [Internet]. 2012. Available from: <https://investors.merck.com/financials/annual-reports-and-proxy/default.aspx>
46. Merck. Merck & Co. 2016 annual report as filed with the Securities and Exchange Commission [Internet]. 2017. Available from: <https://investors.merck.com/financials/annual-reports-and-proxy/default.aspx>

47. GSK. Annual report 2017 [Internet]. London; 2018. Available from: <https://www.gsk.com/en-gb/investors/corporate-reporting/annual-report-2017/>
48. GSK. GSK Annual Report 2007. 2008.
49. GSK. GSK Annual Report 2010 [Internet]. 2011. Available from: <http://www.annualreports.com/Company/glaxosmithkline-plc>
50. GSK. GSK Annual Report 2013. 2014.
51. GSK. GSK Annual Report 2016. 2017.
52. GSK. GSK Annual Report 2018 [Internet]. 2019. Available from: <https://www.gsk.com/en-gb/investors/corporate-reporting/annual-report-2018/>
53. Health Canada. Patent Register—Drug Products [Internet]. Government of Canada. 2018 [cited 2018 Dec 17]. Available from: [http://pr-rdb.hc-sc.gc.ca/pr-rdb/patent\\_result-resultat\\_brevet.do?action=search\\_recherche&din=02437058&patentNumber\\_numeroBrevet=2479304&drugId=4404&lang=fr&formId=8816](http://pr-rdb.hc-sc.gc.ca/pr-rdb/patent_result-resultat_brevet.do?action=search_recherche&din=02437058&patentNumber_numeroBrevet=2479304&drugId=4404&lang=fr&formId=8816)
54. WHO. Global market study—HPV [Internet]. Geneva; 2018. Available from: [https://www.who.int/immunization/programmes\\_systems/procurement/v3p/platform/module2/en/](https://www.who.int/immunization/programmes_systems/procurement/v3p/platform/module2/en/)
55. Kosen S, Andrijono A, Ocviyanti D, Indriatmi W. The Cost-Effectiveness of Quadrivalent Human Papillomavirus Vaccination in Indonesia. *Asian Pac J Cancer Prev* [Internet]. 2017 [cited 2019 Jan 15]; 18(7):2011–7. Available from: <http://www.ncbi.nlm.nih.gov/pubmed/28749644> <https://doi.org/10.22034/APJCP.2017.18.7.2011> PMID: 28749644
56. Das M. Cervical cancer vaccine controversy in India. *Lancet Oncol* [Internet]. 2018 Feb 1 [cited 2019 Jan 15]; 19(2):e84. Available from: <http://www.ncbi.nlm.nih.gov/pubmed/29413482> [https://doi.org/10.1016/S1470-2045\(18\)30018-4](https://doi.org/10.1016/S1470-2045(18)30018-4) PMID: 29413482
57. Hongyu B. HPV vaccines to become more readily available in China. *People's Daily Online* [Internet]. 2018; Available from: <http://en.people.cn/n3/2018/0531/c90000-9466329.html>
58. Sagonowsky E. Boosted by China launch, Merck's Gardasil turns in a big first-quarter performance. *FiercePharma* [Internet]. 2018; Available from: <https://www.fiercepharma.com/pharma/boosted-by-china-launch-merck-s-gardasil-turns-a-big-first-quarter-performance>
59. Lakdawalla DN. Economics of the Pharmaceutical Industry. *J Econ Lit* [Internet]. 2018; 56(2):397–449. Available from: <http://www.aeaweb.org/articles?id=10.1257/jel.20161327>
60. Chandrasekharan S, Amin T, Kim J, Furrer E, Matterson A-C, Schwalbe N, et al. Intellectual property rights and challenges for development of affordable human papillomavirus, rotavirus and pneumococcal vaccines: Patent landscaping and perspectives of developing country vaccine manufacturers. *Vaccine* [Internet]. 2015 Nov 17 [cited 2018 Oct 16]; 33(46):6366–70. Available from: <https://www.sciencedirect.com/science/article/pii/S0264410X15011913> <https://doi.org/10.1016/j.vaccine.2015.08.063> PMID: 26368398
61. UN. LDCs at a Glance [Internet]. United Nations. 2018 [cited 2019 Jan 9]. Available from: <https://www.un.org/development/desa/dpad/least-developed-country-category/lcgs-at-a-glance.html>
62. MSF. A Fair Shot for Vaccine Affordability [Internet]. Geneva; 2017 [cited 2018 Dec 17]. Available from: [https://msfaccess.org/sites/default/files/2018-06/VAC\\_report\\_A\\_Fair\\_Shot\\_for\\_Vaccine\\_Affordability\\_ENG\\_2017.pdf](https://msfaccess.org/sites/default/files/2018-06/VAC_report_A_Fair_Shot_for_Vaccine_Affordability_ENG_2017.pdf)
63. GAVI. Human papillomavirus vaccine support [Internet]. GAVI. 2020 [cited 2020 Mar 29]. Available from: <https://www.gavi.org/types-support/vaccine-support/human-papillomavirus#issue>
64. Sutton J. Technology and market structure: Theory and evidence. Cambridge MIT Press. 1998;
65. Vicente T, Roldão A, Peixoto C, Carrondo MJT, Alves PM. Large-scale production and purification of VLP-based vaccines. Vol. 107, *Journal of Invertebrate Pathology*. Academic Press; 2011. p. S42–8. <https://doi.org/10.1016/j.jip.2011.05.004> PMID: 21784230
66. CDC. Immunization Services Division [Internet]. Center for Disease Control and Prevention. 2020 [cited 2020 May 2]. Available from: <https://www.cdc.gov/ncird/isd.html>
67. Smith J, Lipsitch M, Almond JW. Vaccine production, distribution, access, and uptake. *Lancet* [Internet]. 2011 Jul 30 [cited 2018 Oct 24]; 378(9789):428–38. Available from: <https://www.sciencedirect.com/science/article/pii/S0140673611604789> [https://doi.org/10.1016/S0140-6736\(11\)60478-9](https://doi.org/10.1016/S0140-6736(11)60478-9) PMID: 21664680
68. Tomljenovic L, Shaw CA. Too Fast or Not Too Fast: The FDA's Approval of Merck's HPV Vaccine Gardasil. *J Law, Med Ethics* [Internet]. 2012 Oct 1 [cited 2019 May 15]; 40(3):673–81. Available from: <https://doi.org/10.1111/j.1748-720X.2012.00698.x> PMID: 23061593
69. Federal Reserve Bank. Consumer Price Index: All Items for the United States [Internet]. FRED Economic Data. 2018 [cited 2019 Jun 21]. Available from: <https://fred.stlouisfed.org/series/USACPIALLAINMEI>

70. PAHO. PAHO Revolving Fund [Internet]. PAHO. 2019 [cited 2019 Jan 28]. Available from: [https://www.paho.org/hq/index.php?option=com\\_content&view=category&view=article&id=1864&Itemid=2234&lang=en](https://www.paho.org/hq/index.php?option=com_content&view=category&view=article&id=1864&Itemid=2234&lang=en)
71. GAVI. About Gavi, the Vaccine Alliance [Internet]. GAVI. 2018 [cited 2018 Sep 25]. Available from: <https://www.gavi.org/about/>
72. Nguyen A, Datta D, Schwalbe N, Summers D, Adlide G. Working towards affordable pricing for HPV vaccines for developing countries: The role of GAVI. *Harvard Glob Equity Initiat.* 2011;
73. Yin Y. HPV vaccination in China needs to be more cost-effective. *Lancet* [Internet]. 2017 Oct 14 [cited 2019 Jan 17]; 390(10104):1735–6. Available from: <http://www.ncbi.nlm.nih.gov/pubmed/29047442> [https://doi.org/10.1016/S0140-6736\(17\)32606-5](https://doi.org/10.1016/S0140-6736(17)32606-5) PMID: 29047442
74. Cheung E, Zhang K. Hong Kong medical centres under fire after selling HPV cervical cancer vaccine Gardasil 9 when they couldn't get it. *South China Morning Post* [Internet]. 2018; Available from: <https://www.scmp.com/news/hong-kong/health-environment/article/2151174/hong-kong-medical-centres-under-fire-after-selling>
75. Sabeena S, Bhat P V., Kamath V, Arunkumar G. Global human papilloma virus vaccine implementation: An update. *J Obstet Gynaecol Res* [Internet]. 2018 Jun 1 [cited 2019 Jan 17]; 44(6):989–97. Available from: <http://doi.wiley.com/10.1111/jog.13634> PMID: 29517117
76. Setiawan D, Dolk FC, Suwantika AA, Westra TA, Willschut JC, Postma MJ. Cost-Utility Analysis of Human Papillomavirus Vaccination and Cervical Screening on Cervical Cancer Patient in Indonesia. *Value Heal Reg Issues* [Internet]. 2016 May 1 [cited 2019 Jan 17]; 9:84–92. Available from: <https://www.sciencedirect.com/science/article/pii/S2212109915001065#bib47> <https://doi.org/10.1016/j.vhri.2015.10.010> PMID: 27881267
77. Merck. Merck & Co., Inc. 2018 annual report as filed with the Securities and Exchange Commission [Internet]. 2019. Available from: <https://investors.merck.com/financials/annual-reports-and-proxy/default.aspx>
78. Sankaranarayanan R, Joshi S, Muwonge R, Esmey PO, Basu P, Prabhu P, et al. Can a single dose of human papillomavirus (HPV) vaccine prevent cervical cancer? Early findings from an Indian study. *Vaccine.* 2018 Aug 6; 36(32):4783–91. <https://doi.org/10.1016/j.vaccine.2018.02.087> PMID: 29551226
79. Gottlieb SD. The Patient-Consumer-Advocate Nexus. *Med Anthropol Q* [Internet]. 2013 Sep 1 [cited 2020 Jul 23]; 27(3):330–47. Available from: <http://doi.wiley.com/10.1111/maq.12046> PMID: 24248992
80. Kornfield R, Donohue J, Berndt ER, Alexander GC. Promotion of Prescription Drugs to Consumers and Providers, 2001–2010. *Catapano A, editor. PLoS One* [Internet]. 2013 Mar 4 [cited 2020 Apr 22]; 8(3): e55504. Available from: <https://dx.plos.org/10.1371/journal.pone.0055504> PMID: 23469165
81. Shamp J. Merck Adding \$680M, 425 workers to North Carolina Vaccine Production | North Carolina Biotechnology Center. North Carolina Biotechnology Center [Internet]. 2019 Jul; Available from: <https://www.ncbiotech.org/news/merck-adding-680m-425-workers-north-carolina-vaccine-production>
82. Mahan VL. Clinical Trial Phases. *Int J Clin Med* [Internet]. 2014 [cited 2018 Nov 14]; 5:1374–83. Available from: <http://www.scirp.org/journal/ijcmhttp://dx.doi.org/10.4236/ijcm.2014.521175http://dx.doi.org/10.4236/ijcm.2014.521175http://creativecommons.org/licenses/by/4.0/>
83. Wong CH, Siah KW, Lo AW. Estimation of clinical trial success rates and related parameters. *Biostatistics* [Internet]. 2019 [cited 2020 Apr 20]; 20(2):273–86. Available from: <http://www.ncbi.nlm.nih.gov/pubmed/29394327> <https://doi.org/10.1093/biostatistics/kxx069> PMID: 29394327
84. Gouglas D, Thanh Le T, Henderson K, Kaloudis A, Danielsen T, Hammersland NC, et al. Estimating the cost of vaccine development against epidemic infectious diseases: a cost minimisation study. *Lancet Glob Heal* [Internet]. 2018 Dec 1 [cited 2020 Apr 20]; 6(12):e1386–96. Available from: <http://www.ncbi.nlm.nih.gov/pubmed/30342925> [https://doi.org/10.1016/S2214-109X\(18\)30346-2](https://doi.org/10.1016/S2214-109X(18)30346-2) PMID: 30342925
85. Pronker ES, Weenen TC, Commandeur H, Claassen EHJHM, Osterhaus ADME. Risk in Vaccine Research and Development Quantified. *Vasilakis N, editor. PLoS One* [Internet]. 2013 Mar 20 [cited 2019 Feb 14]; 8(3):e57755. Available from: <https://doi.org/10.1371/journal.pone.0057755> PMID: 23526951
86. Medicines Patent Pool. MPP—Medicines Patent Pool [Internet]. Medicines Patent Pool. 2020 [cited 2020 Mar 30]. Available from: <https://medicinespatentpool.org/>
87. Merck. Merck Announces Collaboration with the Medicines Patent Pool to Expand Access to Pediatric Formulations of Raltegravir in Developing Countries [Internet]. Merck. KENILWORTH, N.J.; 2015 [cited 2020 Mar 30]. Available from: <https://www.mrknewsroom.com/news-release/prescription-medicine-news/merck-announces-collaboration-medicines-patent-pool-expand-a>
